# Supplementary material for: Gridlock from diagnosis to treatment of multidrug resistant tuberculosis (MDR-TB) in Tanzania: patients’ perspectives from a focus group discussion
Source: PubMed Central journal article supplement (PMC7648291; doi:10.1186/s12889-020-09774-3), 2020-11-07
Supplement: 12889_2020_9774_MOESM1_ESM.pdf [file 12889_2020_9774_MOESM1_ESM.pdf]

## FOCUS GROUP GUIDE FOR MDR-TB PARTICIPANTS

### General questions

1. What happened to you before you were diagnosed as MDR-TB?
2. What were the processes you encountered during the MDR-TB diagnosis?
3. What are things that contribute to delay in diagnosis on your side?
4. What are things that contribute to delay in diagnosis on the side of the health care settings (providers and facilities)?
5. What do you recommend to make patients get early diagnosis and initiation of treatment?
